# Supplementary material for: Design of alkali lead oxybromides with a strong second-harmonic generation response and large birefringence
Source: Royal Society of Chemistry journal article supplement (doi:10.1039/d4tc02947j), 2024-01-01
Supplement: d4tc02947j1.pdf [file d4tc02947j1.pdf]

## **Design of alkali lead oxybromides with strong second-harmonic generation response and large birefringence**

Jialin Zeng<sup>a,b</sup>, Shuangcheng Li<sup>a</sup>, Yahui Zhu<sup>a</sup>, Zilong Geng<sup>a,d</sup>, Yiting Luo<sup>a,b</sup>, Ruibiao Fu<sup>\*a,d</sup> and Zuju Ma<sup>\*c</sup>

<sup>a</sup>State Key Laboratory of Structural Chemistry, Fujian Institute of Research on the Structure of Matter, Chinese Academy of Sciences, Fuzhou, Fujian 350002, P. R. China

<sup>b</sup>College of Chemistry and Materials Science, Fujian Normal University, Fuzhou, Fujian 350007, P. R. China

<sup>c</sup>School of Environmental and Materials Engineering, Yantai University, Yantai, 264005, P. R. China

<sup>d</sup>University of Chinese Academy of Sciences, Beijing 100049, China

\*Corresponding author. *E-mail addresses*: furb@fjirsm.ac.cn (R. B. Fu), zjma@outlook.com (Z. J. Ma).

## Computational Details

In the static case, the imaginary part of the static second-order optical susceptibility can be expressed as:

$$\chi^{abc} = \frac{e^3}{\hbar^2 \Omega} \sum_{nm, k} \frac{r_{nm}^a (r_{ml}^b r_{ln}^c + r_{ml}^c r_{ln}^b)}{2\omega_{nm}\omega_{ml}\omega_{ln}} [\omega_n f_{ml} + \omega_m f_{ln} + \omega_l f_{nm}]$$

$$+ \frac{ie^3}{4\hbar^2 \Omega} \sum_{nm, k} \frac{f_{nm}}{\omega_{mn}} [r_{nm}^a (r_{mn; c}^b + r_{mn; b}^c) + r_{nm}^b (r_{mn; c}^a + r_{mn; a}^c) + r_{nm}^c (r_{mn; b}^a + r_{mn; a}^b)]$$

where  $r$  is the position operator,  $\hbar\omega_{nm} = \hbar\omega_n - \hbar\omega_m$  is the energy difference for the bands  $m$  and  $n$ ,  $f_{mn} = f_m - f_n$  is the difference of the Fermi distribution functions, subscripts  $a$ ,  $b$ , and  $c$  are Cartesian indices, and  $r_{mn; a}^b$  is the so-called generalized derivative of the coordinate operator in  $k$  space.

$$r_{nm; a}^b = \frac{r_{nm}^a \Delta_{mn}^b + r_{nm}^b \Delta_{mn}^a}{\omega_{nm}} + \frac{i}{\omega_{nm}} \times \sum_l (\omega_{lm} r_{nl}^a r_{lm}^b - \omega_{nl} r_{nl}^b r_{lm}^a)$$

where  $\Delta_{mn}^a = (p_{nm}^a - p_{mm}^a) / m$  is the difference between the electronic velocities at the bands  $n$  and  $m$ .

The  $\chi^{(2)}$  coefficients here were calculated from PBE wave functions with a  $3 \times 5 \times 5$  (for **Rb<sub>3</sub>[Pb<sub>2</sub>Br<sub>5</sub>(OOC(CH<sub>2</sub>)<sub>3</sub>COO)]**)/ $5 \times 3 \times 5$  (for **Cs<sub>3</sub>[Pb<sub>2</sub>Br<sub>5</sub>(OOC(CH<sub>2</sub>)<sub>3</sub>COO)]**)  $k$ -point grid and about 512 bands. A scissor operator has been added to correct the conduction band energy (corrected to the experimental gap), which has been proved to be reliable in predicting the second-order susceptibility for semiconductors and insulators.[1-3]

For an external radiation electric field  $E$ , the dipole moment  $\mu_i$  of a group can be

expressed as a Taylor series expansion [4, 5]

$$\mu_i = \mu_i^0 + \alpha_{ij}E_j + \frac{1}{2!}\beta_{ijk}E_jE_k + \frac{1}{3!}\gamma_{ijkl}E_jE_kE_l$$

where  $i, j, k$ , and  $l$  subscripts represent the different Cartesian coordinate components  $x, y$ , or  $z$ .  $\mu_i^0$  is the permanent dipole moment of a group, namely the dipole moment without an applied electric field. Physical quantities  $\alpha, \beta$  and  $\gamma$  correspond to the linear polarizability ( $\alpha$ , which corresponds to the linear optical coefficient of a group), first-order hyperpolarizability tensor ( $\beta$ , which is the second-order nonlinear optical coefficient of a group), and second-order hyperpolarizability tensor ( $\gamma$ , which is the third-order nonlinear optical coefficient of a group).

We calculate the static linear polarizability ( $\alpha$ ) and static first-order hyperpolarizability ( $\beta$ ) of  $[\text{PbBr}_4\text{O}_2]$  and  $[\text{OOC}(\text{CH}_2)_3\text{COO}]$  groups at the PBE1PBE level [6] of theory with a reasonably large basis set def2TZVP [7,8] by using the Gaussian 09 program.[9] The polarizability anisotropy ( $\Delta\alpha$ ) was obtained by the following formula to reflect the sources of birefringence.[10]

$$\Delta\alpha = \sqrt{[(\alpha_{xx} - \alpha_{yy})^2 + (\alpha_{xx} - \alpha_{zz})^2 + (\alpha_{yy} - \alpha_{zz})^2]}/2$$

. Tables and Figures

**Table S1.** Crystal data and structure refinements for **Rb<sub>3</sub>[Pb<sub>2</sub>Br<sub>5</sub>(OOC(CH<sub>2</sub>)<sub>3</sub>COO)]**.

| <b>Empirical formula</b>                                        | <b>Rb<sub>3</sub>[Pb<sub>2</sub>Br<sub>5</sub>(OOC(CH<sub>2</sub>)<sub>3</sub>COO)]</b> |
|-----------------------------------------------------------------|-----------------------------------------------------------------------------------------|
| Formula weight                                                  | 1200.44                                                                                 |
| Temperature(K)                                                  | 298(2)                                                                                  |
| Crystal color                                                   | Colorless                                                                               |
| Wavelength(Å)                                                   | 1.54184                                                                                 |
| Crystal system                                                  | Orthorhombic                                                                            |
| Space group                                                     | <i>Imm2</i>                                                                             |
| <i>a</i> / Å                                                    | 20.9890(3)                                                                              |
| <i>b</i> / Å                                                    | 11.98510(10)                                                                            |
| <i>c</i> / Å                                                    | 8.00740(10)                                                                             |
| $\alpha$ / °                                                    | 90                                                                                      |
| $\beta$ / °                                                     | 90                                                                                      |
| $\gamma$ / °                                                    | 90                                                                                      |
| Volume / Å <sup>3</sup>                                         | 2014.30(4)                                                                              |
| <i>Z</i>                                                        | 4                                                                                       |
| Absorption correction                                           | multi-scan                                                                              |
| Crystal size                                                    | 0.3 mm × 0.1 mm × 0.1 mm                                                                |
| $\rho_{\text{calcd}}$ / g·cm <sup>-3</sup>                      | 3.958                                                                                   |
| $\mu$ / mm <sup>-1</sup>                                        | 52.558                                                                                  |
| F(000)                                                          | 2072                                                                                    |
| Data / restraints / parameters                                  | 1875/1/100                                                                              |
| 2-Theta range for data collection                               | 8.429 to 149.944                                                                        |
| Limiting indices                                                | -26 ≤ <i>h</i> ≤ 26, -14 ≤ <i>k</i> ≤ 15, -7 ≤ <i>l</i> ≤ 7                             |
| Reflections collected / unique                                  | 9430/1875 [Rint=0.0453]                                                                 |
| Completeness                                                    | 100%                                                                                    |
| Goodness-of-fit on F <sup>2</sup>                               | 1.072                                                                                   |
| R <sub>1</sub> ,wR <sub>2</sub> ( <i>I</i> > 2σ) <sup>[a]</sup> | R <sub>1</sub> = 0.0293, wR <sub>2</sub> = 0.0818                                       |
| R <sub>1</sub> ,wR <sub>2</sub> (all data)                      | R <sub>1</sub> = 0.0297, wR <sub>2</sub> = 0.0821                                       |
| Largest diff. peak and hole/ e·Å <sup>-3</sup>                  | 1.59 and -1.43                                                                          |
| Flack parameter                                                 | -0.027(11)                                                                              |

<sup>[a]</sup>R<sub>1</sub> =  $\sum||F_o| - |F_c||/\sum|F_o|$  and wR<sub>2</sub> =  $[\sum w(F_o^2 - F_c^2)^2/\sum wF_o^4]^{1/2}$ .

**Table S2.** Crystal data and structure refinements for **Cs<sub>3</sub>[Pb<sub>2</sub>Br<sub>5</sub>(OOC(CH<sub>2</sub>)<sub>3</sub>COO)]**.

| <b>Empirical formula</b>                                         | <b>Cs<sub>3</sub>[Pb<sub>2</sub>Br<sub>5</sub>(OOC(CH<sub>2</sub>)<sub>3</sub>COO)]</b> |
|------------------------------------------------------------------|-----------------------------------------------------------------------------------------|
| Formula weight                                                   | 1342.76                                                                                 |
| Temperature(K)                                                   | 293(2)                                                                                  |
| Crystal color                                                    | Colorless                                                                               |
| Wavelength(Å)                                                    | 1.54184                                                                                 |
| Crystal system                                                   | Orthorhombic                                                                            |
| Space group                                                      | <i>Amm</i> 2                                                                            |
| <i>a</i> / Å                                                     | 12.26789(19)                                                                            |
| <i>b</i> / Å                                                     | 21.5634(4)                                                                              |
| <i>c</i> / Å                                                     | 7.97808(15)                                                                             |
| $\alpha$ / °                                                     | 90                                                                                      |
| $\beta$ / °                                                      | 90                                                                                      |
| $\gamma$ / °                                                     | 90                                                                                      |
| Volume / Å <sup>3</sup>                                          | 2110.50(6)                                                                              |
| <i>Z</i>                                                         | 4                                                                                       |
| Absorption correction                                            | multi-scan                                                                              |
| Crystal size                                                     | 0.2 mm × 0.1 mm × 0.1 mm                                                                |
| $\rho_{\text{calcd}}$ / g·cm <sup>-3</sup>                       | 4.226                                                                                   |
| $\mu$ / mm <sup>-1</sup>                                         | 81.548                                                                                  |
| F(000)                                                           | 2288.0                                                                                  |
| Data / restraints / parameters                                   | 2257/1/101                                                                              |
| 2-Theta range for data collection                                | 7.206 to 149.536                                                                        |
| Limiting indices                                                 | -13 ≤ <i>h</i> ≤ 15, -20 ≤ <i>k</i> ≤ 26, -9 ≤ <i>l</i> ≤ 9                             |
| Reflections collected / unique                                   | 10429/2257 [R <sub>int</sub> =0.0575]                                                   |
| Completeness                                                     | 100%                                                                                    |
| Goodness-of-fit on F <sup>2</sup>                                | 1.067                                                                                   |
| R <sub>1</sub> , wR <sub>2</sub> ( <i>I</i> > 2σ) <sup>[a]</sup> | R <sub>1</sub> = 0.0462, wR <sub>2</sub> = 0.1164                                       |
| R <sub>1</sub> , wR <sub>2</sub> (all data)                      | R <sub>1</sub> = 0.0468, wR <sub>2</sub> = 0.1175                                       |
| Largest diff. peak and hole/ e·Å <sup>-3</sup>                   | 1.25 and -1.09                                                                          |
| Flack parameter                                                  | -0.004(7)                                                                               |

<sup>[a]</sup>R<sub>1</sub> =  $\sum||F_o| - |F_c||/\sum|F_o|$  and wR<sub>2</sub> =  $[\sum w(F_o^2 - F_c^2)^2/\sum wF_o^4]^{1/2}$ .

**Table S3.** Atomic coordinates, equivalent isotropic displacement parameters ( $\text{\AA}^2$ ) and BVS for  $\text{Rb}_3[\text{Pb}_2\text{Br}_5(\text{OOC}(\text{CH}_2)_3\text{COO})]$ .

| Atom | Wyck. | <i>x</i>    | <i>Y</i>    | <i>z</i>    | $U_{\text{eq}}^{\text{a}}$ | BVS <sup>b</sup> |
|------|-------|-------------|-------------|-------------|----------------------------|------------------|
| Pb1  | 8e    | 0.35893(2)  | 0.2516(3)   | 0.31018(16) | 0.0241(2)                  | 2.02             |
| Rb1  | 2a    | 0.5         | 0.5         | 0.396(3)    | 0.0285(5)                  | 1.13             |
| Rb2  | 2b    | 0.5         | 0           | 0.5215(4)   | 0.0359(6)                  | 0.98             |
| Rb3  | 4c    | 0.31151(13) | 0           | 0.7167(4)   | 0.0666(8)                  | 0.79             |
| Rb4  | 4c    | 0.31014(10) | 0.5         | 0.7193(3)   | 0.0485(5)                  | 0.82             |
| Br1  | 4c    | 0.35755(9)  | 0.5         | 0.1758(4)   | 0.0414(5)                  | -0.82            |
| Br2  | 8e    | 0.23558(7)  | 0.26759(14) | 0.4736(2)   | 0.0447(4)                  | -0.74            |
| Br3  | 4c    | 0.34955(11) | 0           | 0.2662(5)   | 0.0626(10)                 | -1.03            |
| Br4  | 4d    | 0.5         | 0.21964(18) | 0.2375(3)   | 0.0329(4)                  | -0.94            |
| O1   | 8e    | 0.3993(4)   | 0.1722(7)   | 0.5889(14)  | 0.038(2)                   | -2.00            |
| O2   | 8e    | 0.4047(4)   | 0.3536(7)   | 0.5583(11)  | 0.031(17)                  | -2.15            |
| C1   | 8e    | 0.4131(6)   | 0.2681(10)  | 0.642(18)   | 0.029(3)                   |                  |
| C2   | 4d    | 0.5         | 0.3454(12)  | 0.837(20)   | 0.034(4)                   |                  |
| C3   | 8e    | 0.4395(6)   | 0.2777(15)  | 0.819(30)   | 0.051(4)                   |                  |

<sup>a</sup> $U_{\text{eq}}$  is defined as 1/3 of the trace of the orthogonalised  $U_{ij}$  tensor.

<sup>b</sup>Bond valence sums were calculated by the equation:  $s = \exp [(R_0 - R_i)/b]$ , where  $R_0$  and  $b$  are the bond valence parameters and  $R_i$  is the observed bond lengths.

**Table S4.** Atomic coordinates, equivalent isotropic displacement parameters ( $\text{\AA}^2$ ) and BVS for  $\text{Cs}_3[\text{Pb}_2\text{Br}_5(\text{OOC}(\text{CH}_2)_3\text{COO})]$ .

| Atom | Wyck. | <i>x</i>    | <i>y</i>    | <i>z</i>   | $U_{\text{eq}}^{\text{a}}$ | BVS <sup>b</sup> |
|------|-------|-------------|-------------|------------|----------------------------|------------------|
| Pb1  | 8f    | 0.24769(3)  | 0.3596(2)   | 0.5859(2)  | 0.0344(7)                  | 1.90             |
| Cs1  | 4e    | 0.5         | 0.30754(8)  | 0.1727(2)  | 0.0482(8)                  | 0.98             |
| Cs2  | 2b    | 0.5         | 0.5         | 0.5141(3)  | 0.0361(8)                  | 1.47             |
| Cs3  | 4d    | 0           | 0.31582(9)  | 0.1386(3)  | 0.0604(9)                  | 0.89             |
| Cs4  | 2a    | 0           | 0.5         | 0.3718(3)  | 0.0408(8)                  | 1.22             |
| Br1  | 4e    | 0.5         | 0.35609(13) | 0.7121(5)  | 0.0523(10)                 | -0.93            |
| Br2  | 8f    | 0.25203(12) | 0.24121(10) | 0.4125(4)  | 0.048(9)                   | -0.94            |
| Br3  | 4d    | 0           | 0.3513(14)  | 0.6474(5)  | 0.058(11)                  | -0.95            |
| Br4  | 4c    | 0.2193(2)   | 0.5         | 0.6636(3)  | 0.0397(8)                  | -0.78            |
| O1   | 8f    | 0.3515(9)   | 0.405(6)    | 0.3402(16) | 0.039(2)                   | -2.13            |
| O2   | 8f    | 0.1731(10)  | 0.3992(6)   | 0.3092(17) | 0.045(3)                   | -1.89            |
| C1   | 8f    | 0.2632(13)  | 0.4132(7)   | 0.2580(20) | 0.032(3)                   |                  |
| C2   | 8f    | 0.2761(18)  | 0.4405(8)   | 0.79(30)   | 0.048(3)                   |                  |
| C3   | 4c    | 0.3417(15)  | 0.5         | 0.63(30)   | 0.038(4)                   |                  |

<sup>a</sup> $U_{\text{eq}}$  is defined as 1/3 of the trace of the orthogonalised  $U_{ij}$  tensor.

<sup>b</sup>Bond valence sums were calculated by the equation:  $s = \exp [(R_0 - R_i)/b]$ , where  $R_0$  and  $b$  are the bond valence parameters and  $R_i$  is the observed bond lengths.

**Table S5.** Anisotropic displacement parameters ( $\text{\AA}^2$ ) for  $\text{Rb}_3[\text{Pb}_2\text{Br}_5(\text{OOC}(\text{CH}_2)_3\text{COO})]$ .

| Atom | $U_{11}$   | $U_{22}$   | $U_{33}$   | $U_{23}$    | $U_{13}$    | $U_{12}$     |
|------|------------|------------|------------|-------------|-------------|--------------|
| Pb1  | 0.0184(3)  | 0.0236(3)  | 0.0302(3)  | 0.00211(15) | -0.0027(2)  | -0.00039(10) |
| Rb1  | 0.0227(8)  | 0.0251(9)  | 0.0378(13) | 0.0000      | 0.0000      | 0.0000       |
| Rb2  | 0.0285(10) | 0.0233(9)  | 0.0561(17) | 0.0000      | 0.0000      | 0.0000       |
| Rb3  | 0.0568(13) | 0.0407(11) | 0.102(2)   | 0.0000      | 0.0433(14)  | 0.0000       |
| Rb4  | 0.0331(9)  | 0.0463(11) | 0.0662(15) | 0.0000      | 0.0102(9)   | 0.0000       |
| Br1  | 0.0433(10) | 0.0274(8)  | 0.0535(13) | 0.0000      | -0.0176(8)  | 0.0000       |
| Br2  | 0.0299(7)  | 0.0659(9)  | 0.0382(9)  | 0.0052(8)   | 0.0091(6)   | -0.0014(6)   |
| Br3  | 0.0426(9)  | 0.0230(8)  | 0.122(3)   | 0.0000      | -0.0266(13) | 0.0000       |
| Br4  | 0.0217(7)  | 0.0449(9)  | 0.0322(9)  | 0.0037(9)   | 0.0000      | 0.0000       |
| O1   | 0.031(4)   | 0.032(4)   | 0.052(6)   | 0.008(4)    | 0.007(4)    | 0.001(3)     |
| O2   | 0.028(4)   | 0.034(4)   | 0.031(4)   | 0.003(4)    | -0.002(3)   | 0.002(3)     |
| C1   | 0.018(5)   | 0.038(6)   | 0.031(7)   | 0.007(5)    | 0.004(5)    | 0.000(4)     |
| C2   | 0.043(8)   | 0.024(6)   | 0.034(10)  | -0.006(7)   | 0.0000      | 0.0000       |
| C3   | 0.022(5)   | 0.101(11)  | 0.030(7)   | 0.030(11)   | 0.000(6)    | -0.006(6)    |

**Table S6.** Anisotropic displacement parameters ( $\text{\AA}^2$ ) for  $\text{Cs}_3[\text{Pb}_2\text{Br}_5(\text{OOC}(\text{CH}_2)_3\text{COO})]$ .

| Atom | $U_{11}$   | $U_{22}$   | $U_{33}$   | $U_{23}$   | $U_{13}$    | $U_{12}$    |
|------|------------|------------|------------|------------|-------------|-------------|
| Pb1  | 0.0309(8)  | 0.0304(8)  | 0.042(8)   | 0.0001(3)  | 0.00097(18) | 0.00093(13) |
| Cs1  | 0.0412(10) | 0.0411(10) | 0.0623(12) | -0.0056(6) | 0.0000      | 0.0000      |
| Cs2  | 0.0294(9)  | 0.0305(10) | 0.0486(12) | 0.0000     | 0.0000      | 0.0000      |
| Cs3  | 0.0418(10) | 0.054(11)  | 0.0852(17) | -0.0247(9) | 0.0000      | 0.0000      |
| Cs4  | 0.0268(9)  | 0.0355(11) | 0.0599(13) | 0.0000     | 0.0000      | 0.0000      |
| Br1  | 0.0419(14) | 0.044(14)  | 0.071(2)   | 0.0186(11) | 0.0000      | 0.0000      |
| Br2  | 0.0517(14) | 0.04(12)   | 0.0523(13) | -0.0091(9) | 0.0029(6)   | -0.0007(5)  |
| Br3  | 0.0304(12) | 0.0515(15) | 0.092(3)   | 0.0167(14) | 0.0000      | 0.0000      |
| Br4  | 0.0382(12) | 0.0355(12) | 0.0455(13) | 0.0000     | -0.0023(10) | 0.0000      |
| O1   | 0.031(4)   | 0.044(5)   | 0.043(5)   | 0.001(4)   | -0.001(4)   | 0.001(4)    |
| O2   | 0.039(5)   | 0.044(5)   | 0.052(6)   | -0.003(5)  | -0.008(5)   | 0.0000      |
| C1   | 0.043(7)   | 0.017(6)   | 0.035(8)   | -0.002(5)  | -0.013(5)   | 0.001(4)    |
| C2   | 0.075(9)   | 0.041(8)   | 0.029(7)   | 0.001(7)   | -0.013(10)  | -0.008(8)   |
| C3   | 0.032(8)   | 0.051(10)  | 0.032(9)   | 0.0000     | 0.007(7)    | 0.0000      |

**Table S7.** Selected bond lengths (Å) and angles (deg.) for **Rb<sub>3</sub>[Pb<sub>2</sub>Br<sub>5</sub>(OOC(CH<sub>2</sub>)<sub>3</sub>COO)]**.

|                           |            |                           |            |
|---------------------------|------------|---------------------------|------------|
| Pb(1)-O(1)                | 2.570(11)  | Pb(1)-Br(2)               | 2.9074(16) |
| Pb(1)-O(2)                | 2.523(9)   | Pb(1)-Br(3)               | 3.0423(6)  |
| Pb(1)-Br(1)               | 3.1657(11) | Pb(1)-Br(4)               | 3.0417(7)  |
| Rb(1)-Br(1)               | 3.471(2)   | Rb(3)-Br(1) <sup>#6</sup> | 3.564(3)   |
| Rb(1)-Br(1) <sup>#1</sup> | 3.471(2)   | Rb(3)-Br(2)               | 4.076(3)   |
| Rb(1)-Br(4)               | 3.592(2)   | Rb(3)-Br(2) <sup>#5</sup> | 4.076(3)   |
| Rb(1)-Br(4) <sup>#1</sup> | 3.592(2)   | Rb(3)-Br(2) <sup>#6</sup> | 3.601(3)   |
| Rb(1)-O(2)                | 2.961(8)   | Rb(3)-Br(2) <sup>#7</sup> | 3.601(3)   |
| Rb(1)-O(2) <sup>#1</sup>  | 2.961(8)   | Rb(3)-Br(3)               | 3.695(5)   |
| Rb(1)-O(2) <sup>#2</sup>  | 2.961(8)   | Rb(3)-O(1)                | 2.950(9)   |
| Rb(1)-O(2) <sup>#3</sup>  | 2.961(8)   | Rb(3)-O(1) <sup>#5</sup>  | 2.950(9)   |
| Rb(2)-Br(3)               | 3.762(3)   | Rb(4)-Br(1) <sup>#8</sup> | 3.789(4)   |
| Rb(2)-Br(3) <sup>#4</sup> | 3.762(3)   | Rb(4)-Br(2)               | 3.752(2)   |
| Rb(2)-Br(4)               | 3.479(3)   | Rb(4)-Br(2) <sup>#2</sup> | 3.752(2)   |
| Rb(2)-Br(4) <sup>#4</sup> | 3.478(3)   | Rb(4)-Br(2) <sup>#7</sup> | 3.919(2)   |
| Rb(2)-O(1)                | 3.003(9)   | Rb(4)-Br(2) <sup>#9</sup> | 3.919(2)   |
| Rb(2)-O(1) <sup>#3</sup>  | 3.003(9)   | Rb(4)-Br(3) <sup>#7</sup> | 3.373(3)   |
| Rb(2)-O(1) <sup>#4</sup>  | 3.003(9)   | Rb(4)-O(2)                | 2.946(8)   |
| Rb(2)-O(1) <sup>#5</sup>  | 3.003(9)   | Rb(4)-O(2) <sup>#2</sup>  | 2.946(8)   |
| C(1)- O(1)                | 1.260(15)  | C(1)- O(2)                | 1.237(15)  |
| O(1)-Pb(1)-Br(2)          | 85.8(2)    | Br(1)-Pb(1)-Br(3)         | 153.15(10) |
| O(1)-Pb(1)-Br(3)          | 75.8(2)    | Br(1)-Pb(1)-Br(4)         | 93.57(6)   |
| O(1)-Pb(1)-Br(4)          | 78.4(2)    | Br(2)-Pb(1)-Br(3)         | 93.43(7)   |
| O(2)-Pb(1)-Br(1)          | 79.36(19)  | Br(2)-Pb(1)-Br(4)         | 163.99(7)  |
| O(2)-Pb(1)-Br(2)          | 87.28(19)  | Br(3)-Pb(1)-Br(4)         | 85.18(6)   |
| O(2)-Pb(1)-Br(3)          | 126.6(2)   |                           |            |

Symmetry transformations used to generate equivalent atoms: #1 1 - x, 1 - y, z; #2 x, 1 - y, z; #3 1 - x, y, z; #4 1 - x, - y, z; #5 x, - y, z; #6 1/2 - x, - 1/2 + y, 1/2 + z; #7 1/2 - x, 1/2 - y, 1/2 + z; #8 x, y, 1 + z; #9 1/2 - x, 1/2 + y, 1/2 + z.



---

**Table S8.** Selected bond lengths (Å) and angles (deg.) for **Cs<sub>3</sub>[Pb<sub>2</sub>Br<sub>5</sub>(OOC(CH<sub>2</sub>)<sub>3</sub>COO)]**.

---

|                           |            |                           |            |
|---------------------------|------------|---------------------------|------------|
| Pb(1)-O(1)                | 2.534(12)  | Pb(1)-Br(2)               | 2.904(2)   |
| Pb(1)-O(2)                | 2.537(13)  | Pb(1)-Br(3)               | 3.0831(9)  |
| Pb(1)-Br(1)               | 3.2558(13) | Pb(1)-Br(4)               | 3.1098(9)  |
| Cs(1)-Br(1) <sup>#4</sup> | 3.542(3)   | Cs(3)-Br(2)               | 4.114(3)   |
| Cs(1)-Br(1) <sup>#5</sup> | 3.821(4)   | Cs(3)-Br(2) <sup>#6</sup> | 3.785(2)   |
| Cs(1)-Br(2)               | 3.868(2)   | Cs(3)-Br(2) <sup>#8</sup> | 4.114(3)   |
| Cs(1)-Br(2) <sup>#3</sup> | 3.868(2)   | Cs(3)-Br(2) <sup>#7</sup> | 3.785(2)   |
| Cs(1)-Br(2) <sup>#4</sup> | 3.830(2)   | Cs(3)-Br(3)               | 4.131(5)   |
| Cs(1)-Br(2) <sup>#6</sup> | 3.830(2)   | Cs(3)-Br(3) <sup>#5</sup> | 3.993(5)   |
| Cs(1)-O(1)                | 3.086(12)  | Cs(3)-Br(3) <sup>#7</sup> | 3.604(4)   |
| Cs(1)-O(1) <sup>#3</sup>  | 3.086(12)  | Cs(3)-O(2)                | 3.098(12)  |
| Cs(2)-Br(1)               | 3.482(3)   | Cs(3)-O(2) <sup>#8</sup>  | 3.098(12)  |
| Cs(2)-Br(1) <sup>#2</sup> | 3.482(3)   | Cs(4)-Br(3)               | 3.888(3)   |
| Cs(2)-Br(4)               | 3.644(3)   | Cs(4)-Br(3) <sup>#9</sup> | 3.888(3)   |
| Cs(2)-Br(4) <sup>#2</sup> | 3.644(3)   | Cs(4)-Br(4)               | 3.558(3)   |
| Cs(2)-O(1)                | 3.072(12)  | Cs(4)-Br(4) <sup>#9</sup> | 3.558(3)   |
| Cs(2)-O(1) <sup>#1</sup>  | 3.072(12)  | Cs(4)-O(2)                | 3.080(12)  |
| Cs(2)-O(1) <sup>#2</sup>  | 3.072(12)  | Cs(4)-O(2) <sup>#1</sup>  | 3.080(12)  |
| Cs(2)-O(1) <sup>#3</sup>  | 3.072(12)  | Cs(4)-O(2) <sup>#8</sup>  | 3.080(12)  |
| C(1)-O(1)                 | 1.277(19)  | Cs(4)-O(2) <sup>#9</sup>  | 3.080(12)  |
| C(1)-O(2)                 | 1.22(2)    |                           |            |
| O(1)-Pb(1)-O(2)           | 51.6(4)    | O(2)-Pb(1)-Br(4)          | 78.8(3)    |
| O(1)-Pb(1)-Br(1)          | 76.7(3)    | Br(1)-Pb(1)-Br(2)         | 96.29(7)   |
| O(1)-Pb(1)-Br(2)          | 87.8(3)    | Br(1)-Pb(1)-Br(3)         | 153.43(11) |
| O(1)-Pb(1)-Br(3)          | 129.8(3)   | Br(1)-Pb(1)-Br(4)         | 93.86(7)   |
| O(1)-Pb(1)-Br(4)          | 80.5(3)    | Br(2)-Pb(1)-Br(3)         | 92.45(8)   |
| O(2)-Pb(1)-Br(1)          | 128.3(3)   | Br(2)-Pb(1)-Br(4)         | 162.32(9)  |
| O(2)-Pb(1)-Br(2)          | 83.6(3)    | Br(3)-Pb(1)-Br(4)         | 85.10(8)   |
| O(2)-Pb(1)-Br(3)          | 78.6(3)    |                           |            |

---

Symmetry transformations used to generate equivalent atoms: #1  $x, 1 - y, z$ ; #2  $1 - x, 1 - y, z$ ; #3  $1 - x, y, z$ ; #4  $1 - x, 1/2 - y, -1/2 + z$ ; #5  $x, y, z - 1$ ; #6  $x, 1/2 - y, -1/2 + z$ ; #7  $-x, 1/2 - y, -1/2 + z$ ; #8  $-x, y, z$ ; #9  $-x, 1 - y, z$ .

**Table S9.** The local dipole moment ( $\mu$ ) in Debye, as well as polarizability anisotropy ( $\Delta\alpha$ ) for eight  $[\text{PbBr}_4\text{O}_2]$  polyhedrons and four  $[\text{OOC}(\text{CH}_2)_3\text{COO}]$  groups in per unit cell of  $\text{Rb}_3[\text{Pb}_2\text{Br}_5(\text{OOC}(\text{CH}_2)_3\text{COO})]$ . The charge of the structural group was estimated by the Bader charge of each atom.

| Dipole moment                                  | $\mu_x$ | $\mu_y$ | $\mu_z$ | $\mu$ | $\Delta\alpha$ |
|------------------------------------------------|---------|---------|---------|-------|----------------|
| $[\text{PbBr}_4\text{O}_2]$                    | -4.01   | 0.79    | -6.42   | 7.61  | 7.22           |
| $[\text{PbBr}_4\text{O}_2]$                    | 4.01    | 0.79    | -6.42   | 7.61  | 7.22           |
| $[\text{PbBr}_4\text{O}_2]$                    | -4.01   | -0.79   | -6.42   | 7.61  | 7.22           |
| $[\text{PbBr}_4\text{O}_2]$                    | 4.01    | -0.79   | -6.42   | 7.61  | 7.22           |
| $[\text{PbBr}_4\text{O}_2]$                    | -4.01   | 0.79    | -6.42   | 7.61  | 7.22           |
| $[\text{PbBr}_4\text{O}_2]$                    | 4.01    | 0.79    | -6.42   | 7.61  | 7.22           |
| $[\text{PbBr}_4\text{O}_2]$                    | -4.01   | -0.79   | -6.42   | 7.61  | 7.22           |
| $[\text{PbBr}_4\text{O}_2]$                    | 4.01    | -0.79   | -6.42   | 7.61  | 7.22           |
| Sum( $[\text{PbBr}_4\text{O}_2]$ )             | 0.00    | 0.00    | -51.36  |       |                |
| $[\text{OOC}(\text{CH}_2)_3\text{COO}]$        | 0.00    | -1.74   | 7.56    | 7.76  | 0.92           |
| $[\text{OOC}(\text{CH}_2)_3\text{COO}]$        | 0.00    | 1.74    | 7.56    | 7.76  | 0.92           |
| $[\text{OOC}(\text{CH}_2)_3\text{COO}]$        | 0.00    | -1.74   | 7.56    | 7.76  | 0.92           |
| $[\text{OOC}(\text{CH}_2)_3\text{COO}]$        | 0.00    | 1.74    | 7.56    | 7.76  | 0.92           |
| Sum( $[\text{OOC}(\text{CH}_2)_3\text{COO}]$ ) | 0.00    | 0.00    | 30.24   |       |                |
| Total                                          | 0.00    | 0.00    | -21.12  |       |                |

**Table S10.** The local dipole moment ( $\mu$ ) in Debye, as well as polarizability anisotropy ( $\Delta\alpha$ ) for eight  $[\text{PbBr}_4\text{O}_2]$  polyhedrons and four  $[\text{OOC}(\text{CH}_2)_3\text{COO}]$  groups in per unit cell of  $\text{Cs}_3[\text{Pb}_2\text{Br}_5(\text{OOC}(\text{CH}_2)_3\text{COO})]$ . The charge of the structural group was estimated by the Bader charge of each atom.

| <b>Dipole moment</b>                           | $\mu_x$ | $\mu_y$ | $\mu_z$ | $\mu$ | $\Delta\alpha$ |
|------------------------------------------------|---------|---------|---------|-------|----------------|
| $[\text{PbBr}_4\text{O}_2]$                    | 1.11    | 4.35    | 6.01    | 7.50  | 7.02           |
| $[\text{PbBr}_4\text{O}_2]$                    | -1.11   | 4.35    | 6.01    | 7.50  | 7.02           |
| $[\text{PbBr}_4\text{O}_2]$                    | -1.11   | -4.35   | 6.01    | 7.50  | 7.02           |
| $[\text{PbBr}_4\text{O}_2]$                    | 1.11    | -4.35   | 6.01    | 7.50  | 7.02           |
| $[\text{PbBr}_4\text{O}_2]$                    | 1.11    | 4.35    | 6.01    | 7.50  | 7.02           |
| $[\text{PbBr}_4\text{O}_2]$                    | -1.11   | 4.35    | 6.01    | 7.50  | 7.02           |
| $[\text{PbBr}_4\text{O}_2]$                    | -1.11   | -4.35   | 6.01    | 7.50  | 7.02           |
| $[\text{PbBr}_4\text{O}_2]$                    | 1.11    | -4.35   | 6.01    | 7.50  | 7.02           |
| Sum( $[\text{PbBr}_4\text{O}_2]$ )             | 0.00    | 0.00    | 48.08   |       |                |
| $[\text{OOC}(\text{CH}_2)_3\text{COO}]$        | 0.78    | 0.00    | -7.40   | 7.44  | 0.76           |
| $[\text{OOC}(\text{CH}_2)_3\text{COO}]$        | -0.78   | 0.00    | -7.40   | 7.44  | 0.76           |
| $[\text{OOC}(\text{CH}_2)_3\text{COO}]$        | 0.78    | 0.00    | -7.40   | 7.44  | 0.76           |
| $[\text{OOC}(\text{CH}_2)_3\text{COO}]$        | -0.78   | 0.00    | -7.40   | 7.44  | 0.76           |
| Sum( $[\text{OOC}(\text{CH}_2)_3\text{COO}]$ ) | 0.00    | 0.00    | -29.6   |       |                |
| Total                                          | 0.00    | 0.00    | 18.48   |       |                |

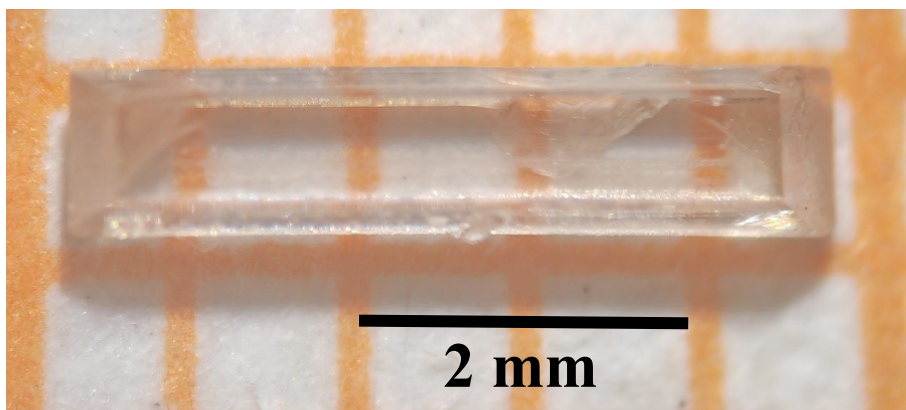

**Figure S1.** A photograph of the as-grown crystal without polishing for  $\text{Rb}_3[\text{Pb}_2\text{Br}_5(\text{OOC}(\text{CH}_2)_3\text{COO})]$ .

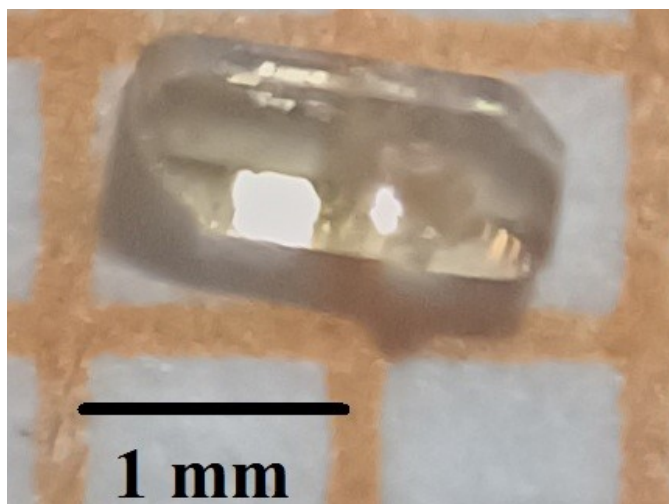

**Figure S2.** A photograph of the as-grown crystal without polishing for  $\text{Cs}_3[\text{Pb}_2\text{Br}_5(\text{OOC}(\text{CH}_2)_3\text{COO})]$ .

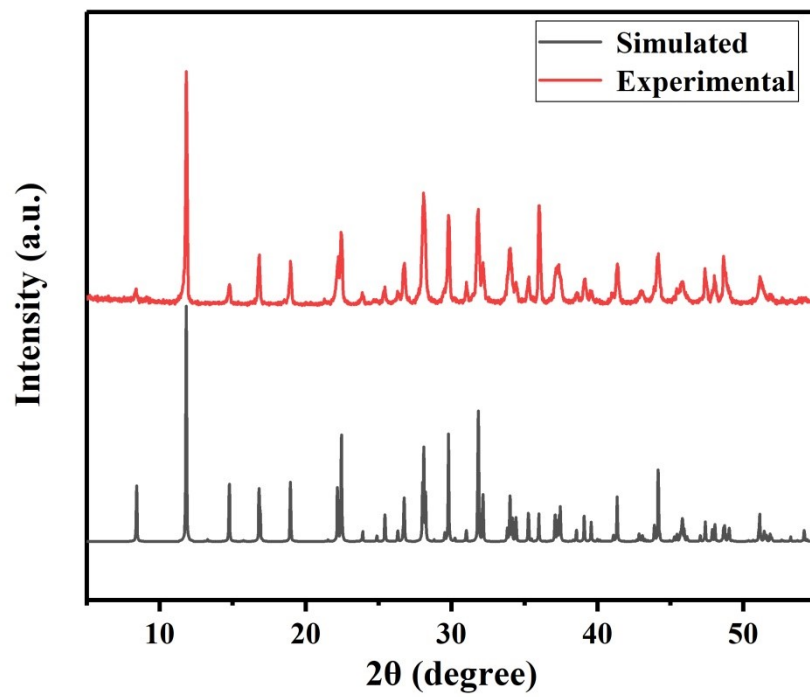

**Figure S3.** Experimental and simulated PXRd patterns of  $\text{Rb}_3[\text{Pb}_2\text{Br}_5(\text{OOC}(\text{CH}_2)_3\text{COO})]$ .

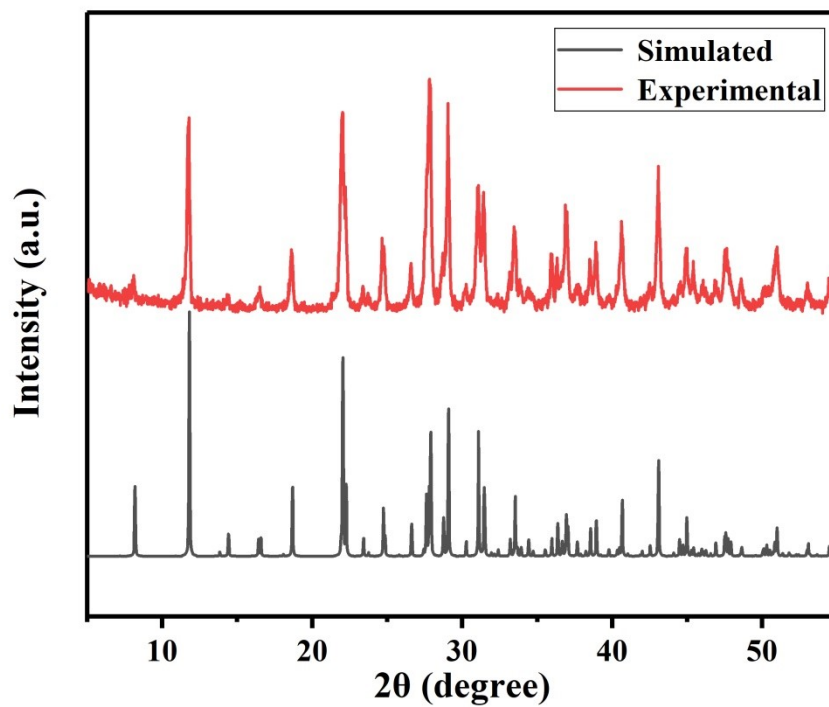

**Figure S4.** Experimental and simulated PXRD patterns of  $\text{Cs}_3[\text{Pb}_2\text{Br}_5(\text{OOC}(\text{CH}_2)_3\text{COO})]$ .

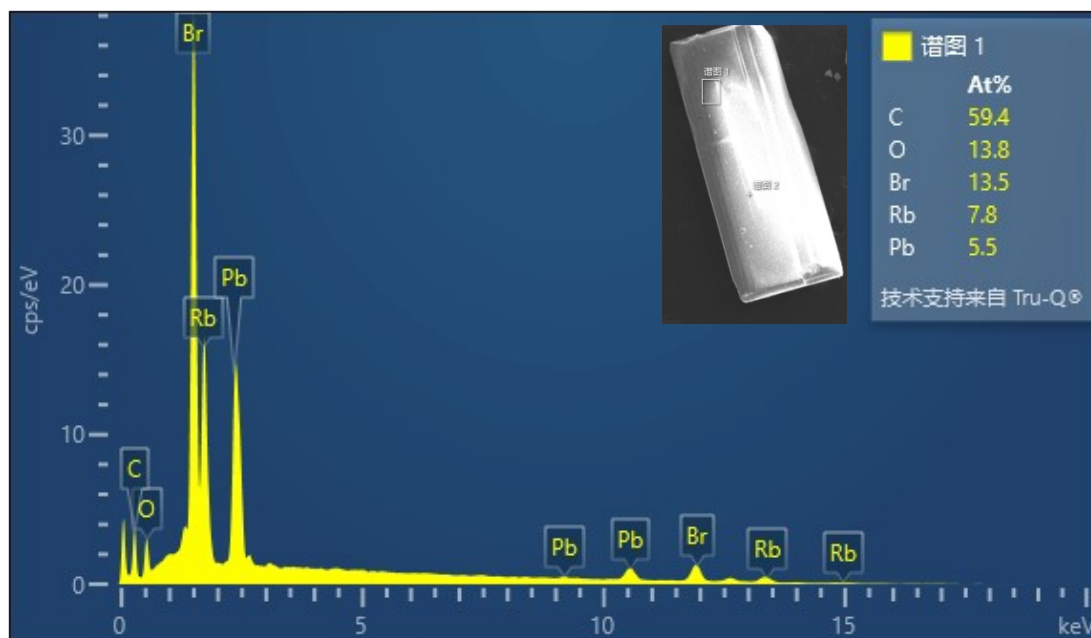

**Figure S5.** The EDS spectrum of  $\text{Rb}_3[\text{Pb}_2\text{Br}_5(\text{OOC}(\text{CH}_2)_3\text{COO})]$ .

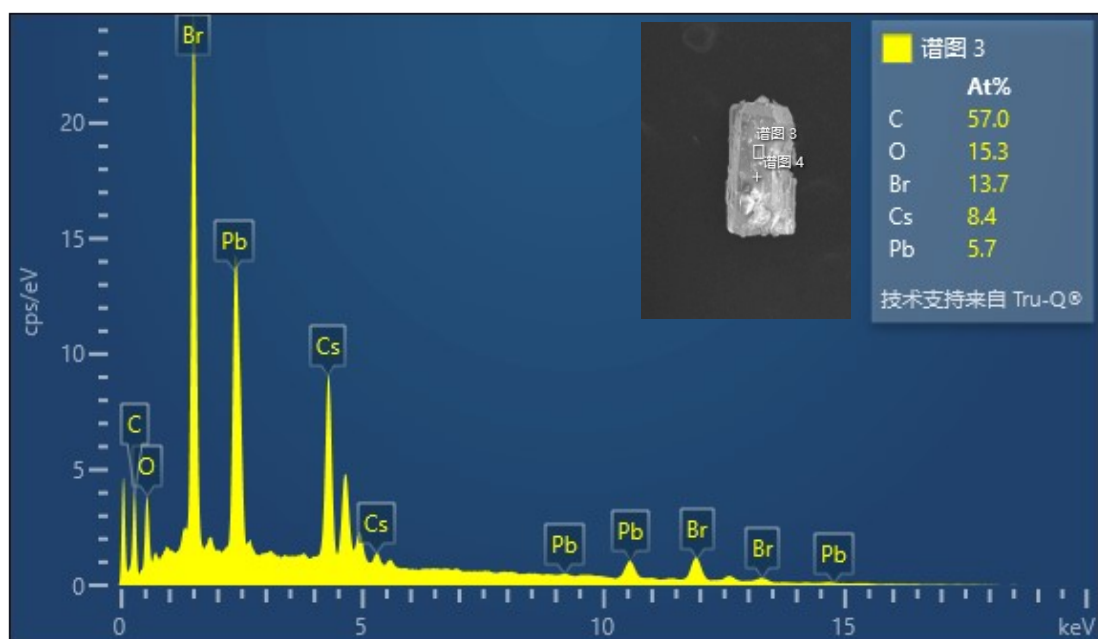

**Figure S6.** The EDS spectrum of  $\text{Cs}_3[\text{Pb}_2\text{Br}_5(\text{OOC}(\text{CH}_2)_3\text{COO})]$ .

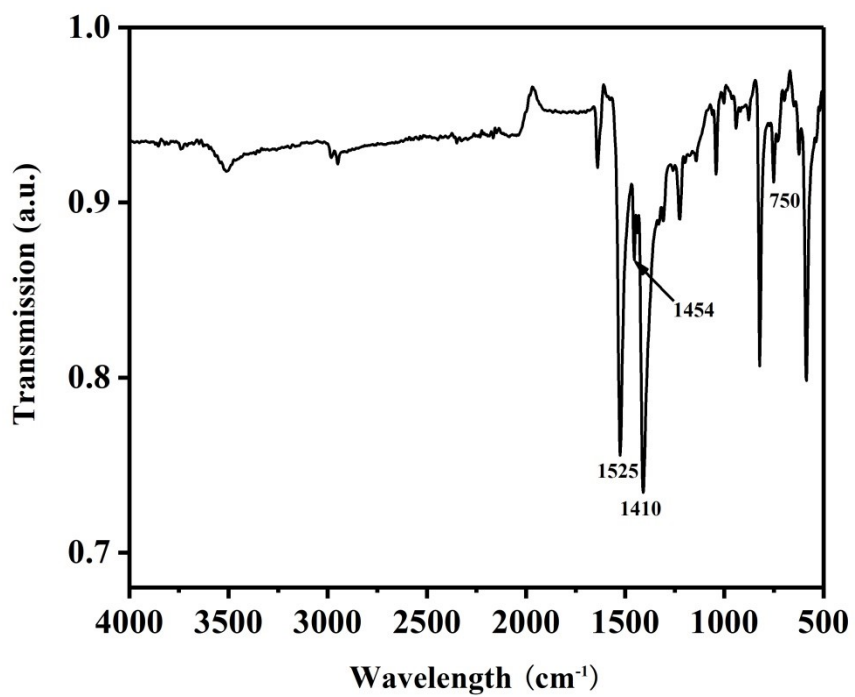

Figure S7. The IR spectrum of  $\text{Rb}_3[\text{Pb}_2\text{Br}_5(\text{OOC}(\text{CH}_2)_3\text{COO})]$ .

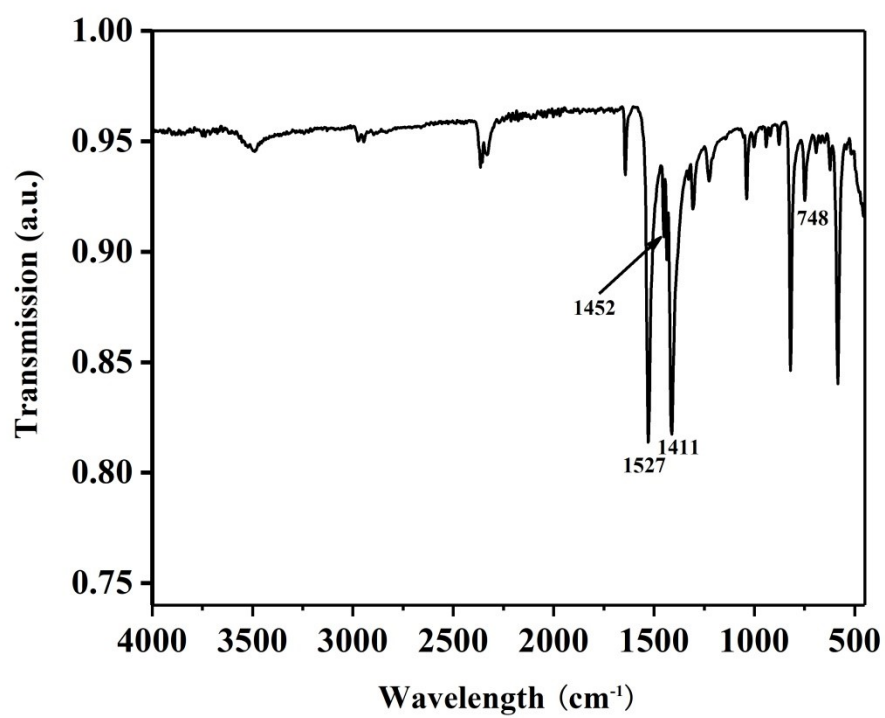

Figure S8. The IR spectrum of  $\text{Cs}_3[\text{Pb}_2\text{Br}_5(\text{OOC}(\text{CH}_2)_3\text{COO})]$ .

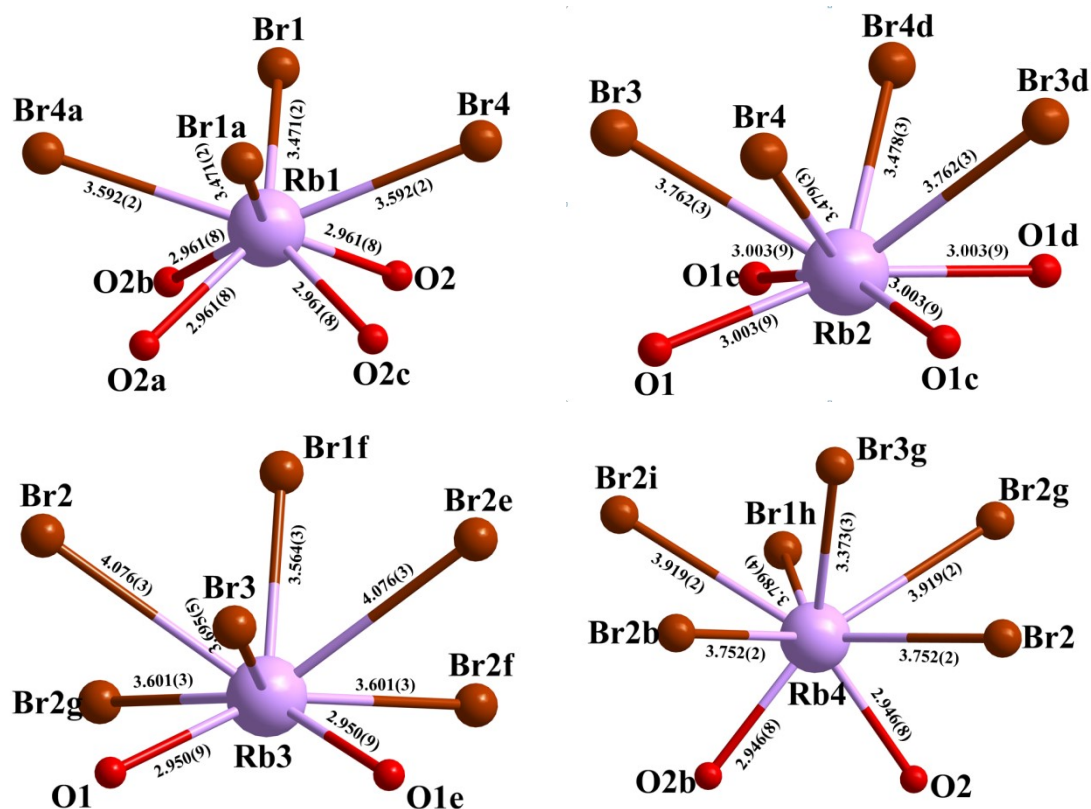

Figure S9. The environments of  $\text{Rb}^+$  cations. Symmetry codes: a  $1 - x, 1 - y, z$ ; b  $x, 1 - y, z$ ; c  $1 - x, y, z$ ; d  $1 - x, -y, z$ ; e  $x, -y, z$ ; f  $1/2 - x, -1/2 + y, 1/2 + z$ ; g  $1/2 - x, 1/2 - y, 1/2 + z$ ; h  $x, y, 1 + z$ ; i  $1/2 - x, 1/2 + y, 1/2 + z$ .

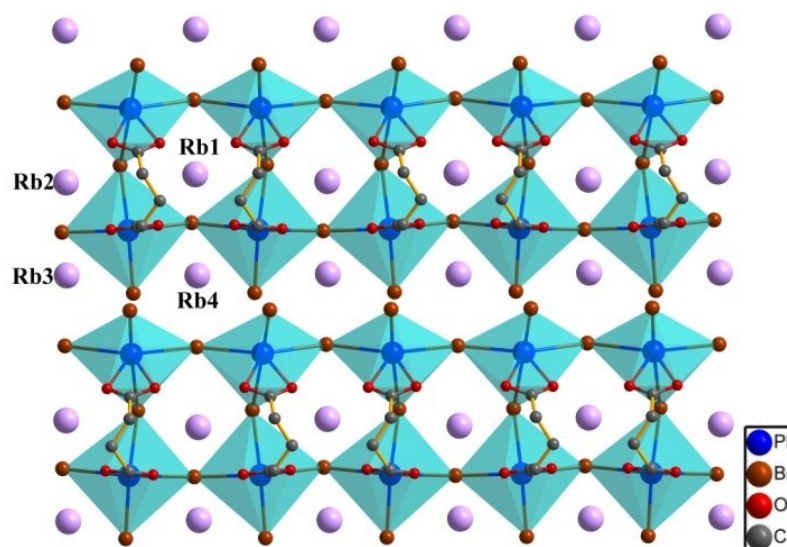



**Figure S10.** Rb<sup>+</sup> cations are embedded into the double [Pb<sub>2</sub>Br<sub>5</sub>(OOC(CH<sub>2</sub>)<sub>3</sub>COO)] chains. Blue-green polyhedron: [PbBr<sub>4</sub>O<sub>2</sub>].

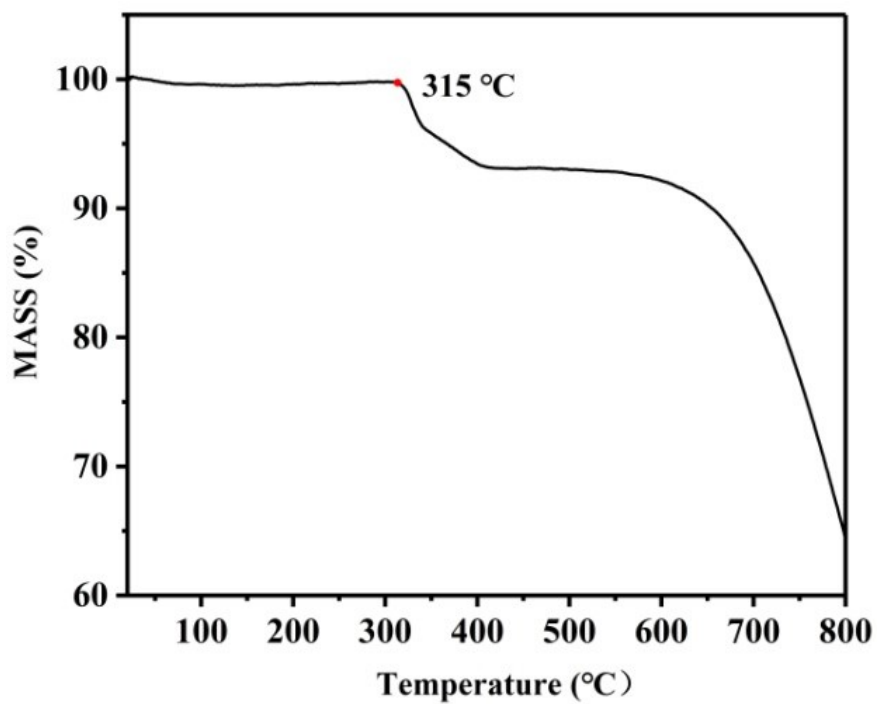

**Figure S11.** The TGA curve of Rb<sub>3</sub>[Pb<sub>2</sub>Br<sub>5</sub>(OOC(CH<sub>2</sub>)<sub>3</sub>COO)].

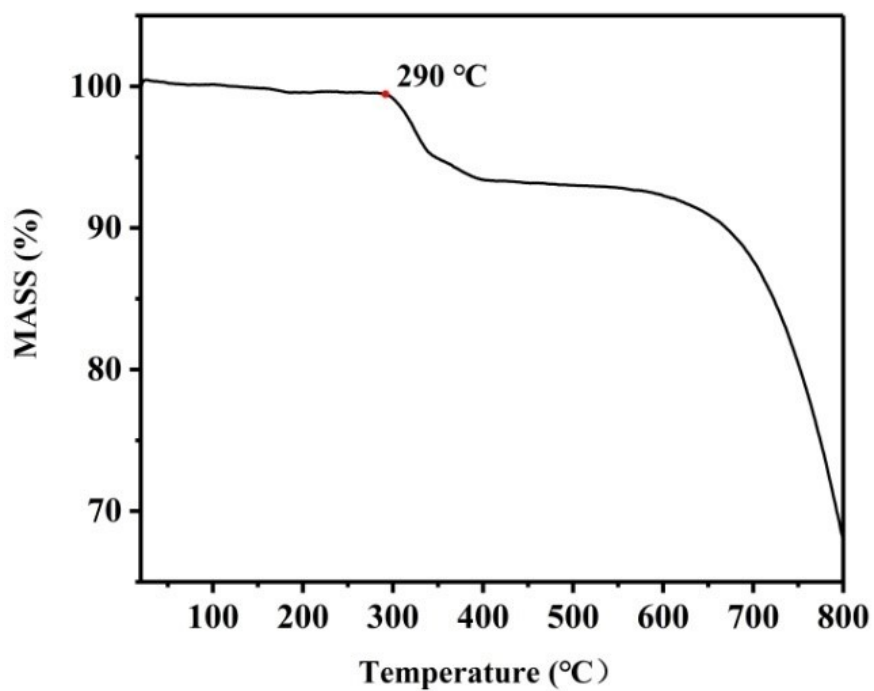

Figure S12. The TGA curve of  $\text{Cs}_3[\text{Pb}_2\text{Br}_5(\text{OOC}(\text{CH}_2)_3\text{COO})]$ .

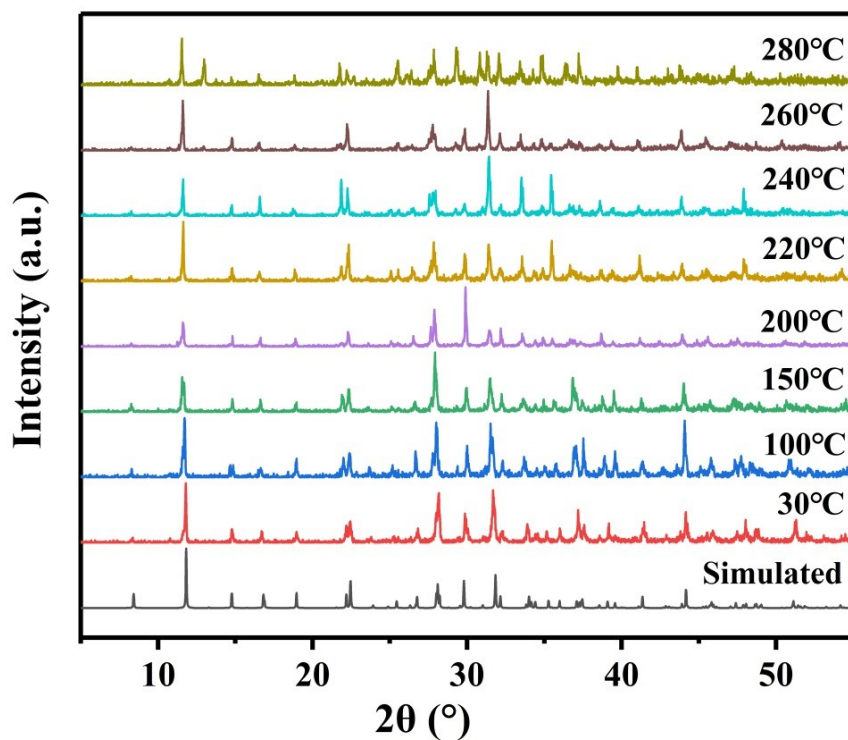

Figure S13. Variable-temperature PXRD patterns of  $\text{Rb}_3[\text{Pb}_2\text{Br}_5(\text{OOC}(\text{CH}_2)_3\text{COO})]$ .

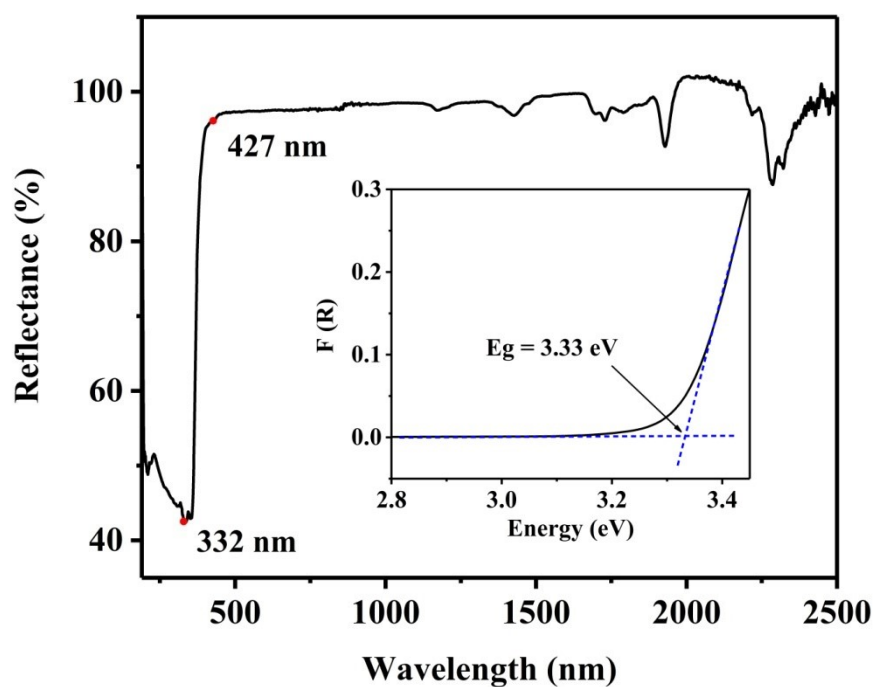

**Figure S14.** The UV-Vis-NIR spectrum of  $\text{Rb}_3[\text{Pb}_2\text{Br}_5(\text{OOC}(\text{CH}_2)_3\text{COO})]$ . Inset: the optical band gap.

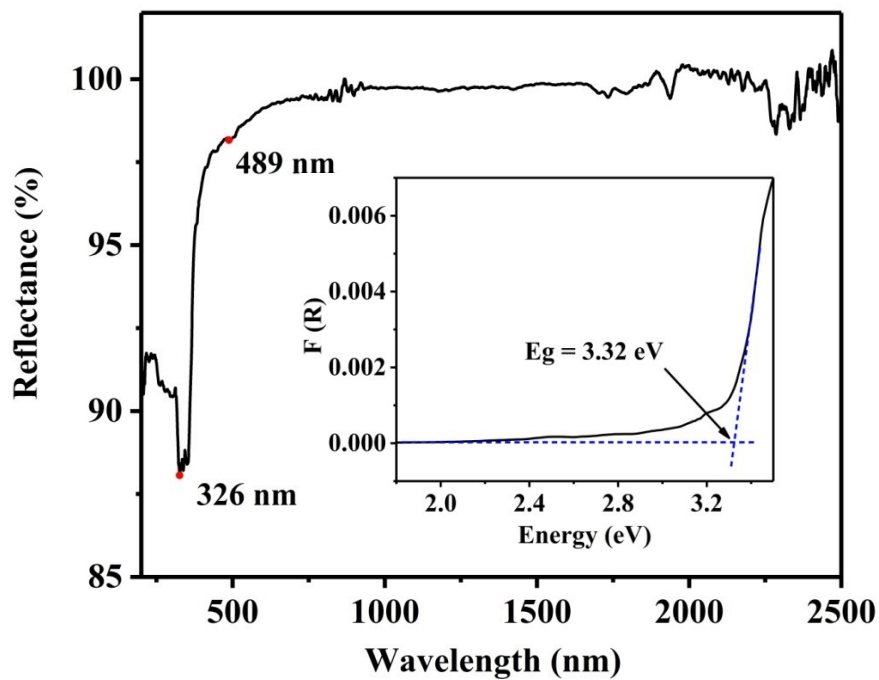

**Figure S15.** The UV-Vis-NIR spectrum of  $\text{Cs}_3[\text{Pb}_2\text{Br}_5(\text{OOC}(\text{CH}_2)_3\text{COO})]$ . Inset: the optical band gap.

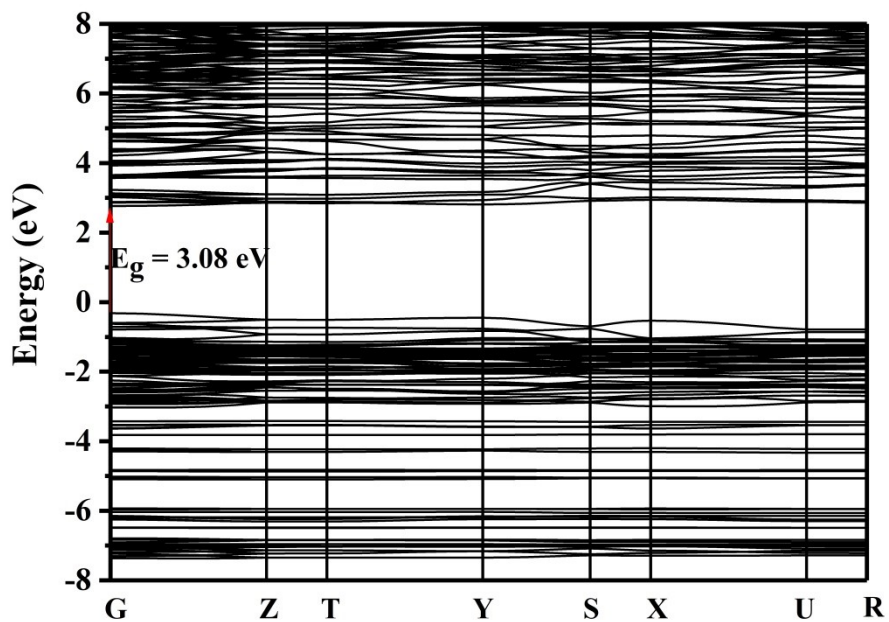

Figure S16. The calculated band structure of  $\text{Rb}_3[\text{Pb}_2\text{Br}_5(\text{OOC}(\text{CH}_2)_3\text{COO})]$ .

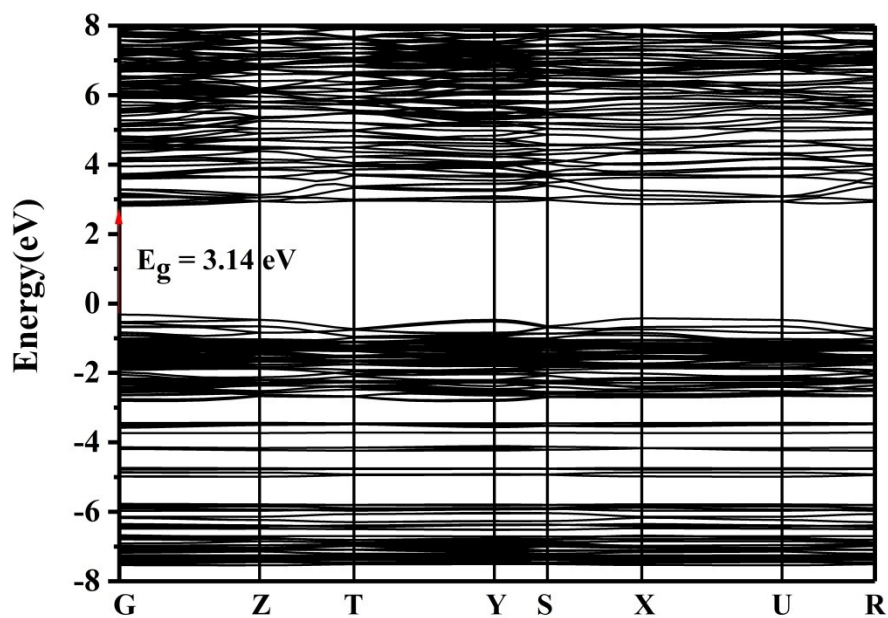

Figure S17. The calculated band structure of  $\text{Cs}_3[\text{Pb}_2\text{Br}_5(\text{OOC}(\text{CH}_2)_3\text{COO})]$ .

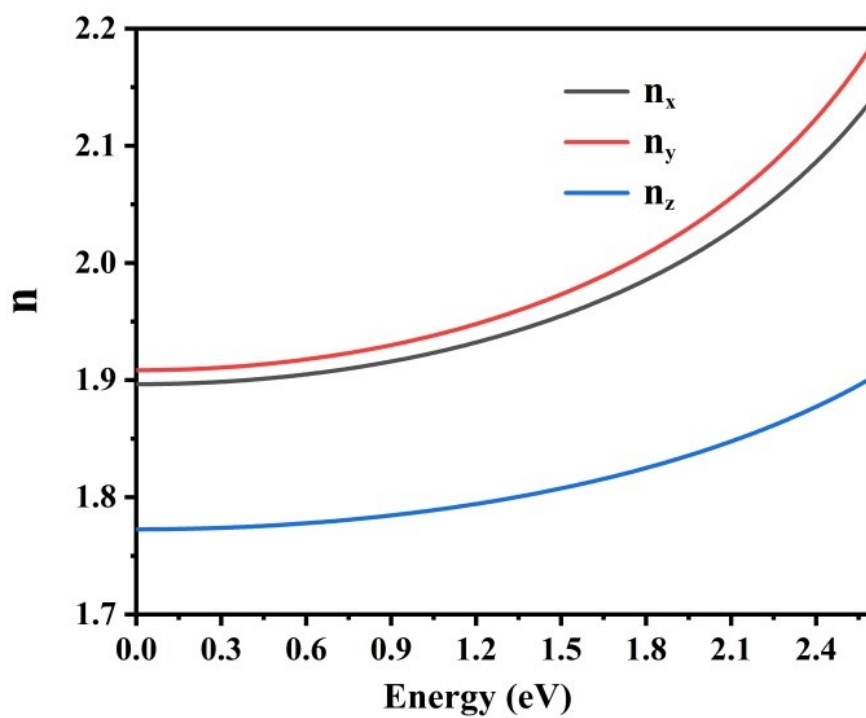

**Figure S18.** Optical refractive indices along principal axes *versus* photon energy for  $\text{Cs}_3[\text{Pb}_2\text{Br}_5(\text{OOC}(\text{CH}_2)_3\text{COO})]$ .

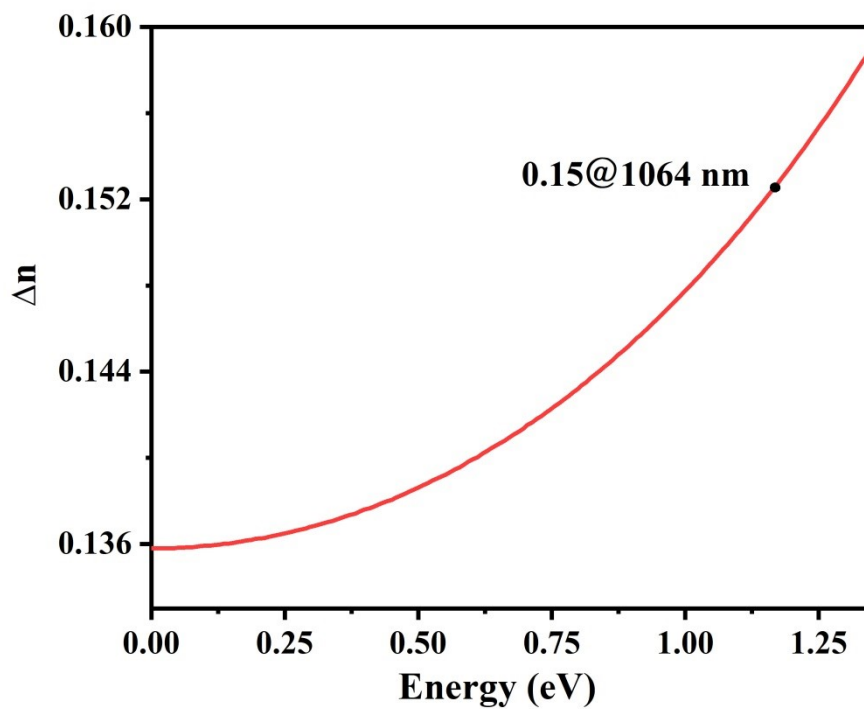

**Figure S19.** The calculated birefringence *versus* photon energy for  $\text{Cs}_3[\text{Pb}_2\text{Br}_5(\text{OOC}(\text{CH}_2)_3\text{COO})]$ .

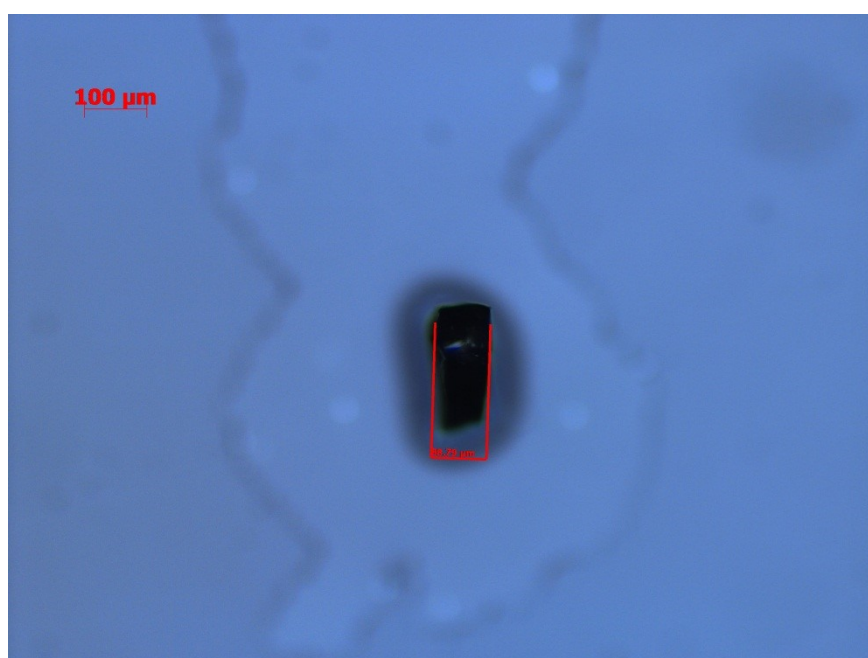

**Figure S20.** The original crystal for the measurement of the birefringence for  $\text{Rb}_3[\text{Pb}_2\text{Br}_5(\text{OOC}(\text{CH}_2)_3\text{COO})]$ .

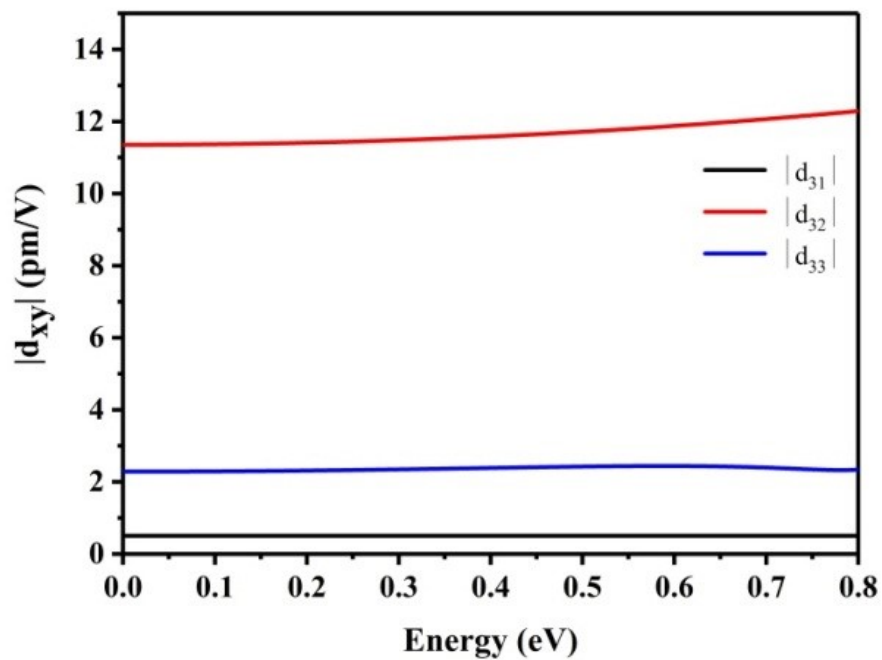

**Figure S21.** Frequency-dependent SHG coefficients of  $|d_{31}|$ ,  $|d_{32}|$  and  $|d_{33}|$  for  $\text{Rb}_3[\text{Pb}_2\text{Br}_5(\text{OOC}(\text{CH}_2)_3\text{COO})]$ .

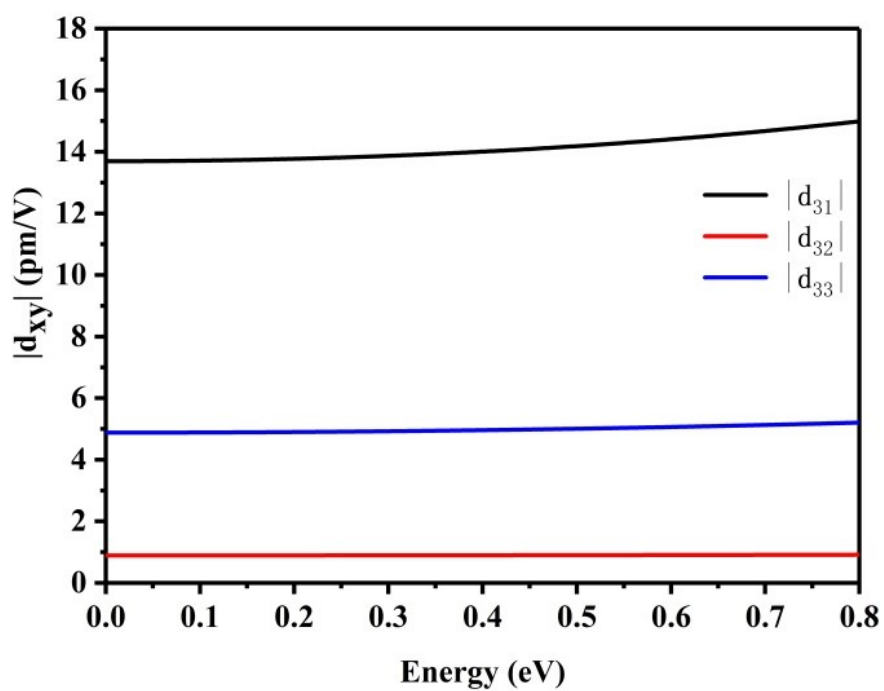

**Figure S22.** Frequency-dependent SHG coefficients of  $|d_{31}|$ ,  $|d_{32}|$  and  $|d_{33}|$  for  $\text{Cs}_3[\text{Pb}_2\text{Br}_5(\text{OOC}(\text{CH}_2)_3\text{COO})]$ .

## References

- [1] B. Champagne, D. M. Bishop, Calculations of nonlinear optical properties for the solid, *Adv. Chem. Phys.*, 2003, 126, 41-92.
- [2] A. H. Reshak, S. Auluck, I. V. Kityk, Specific features in the band structure and linear and nonlinear optical susceptibilities of  $\text{La}_2\text{CaB}_{10}\text{O}_{19}$  crystals, *Phys. Rev. B*, 2007, 75, 245120.
- [3] Y. Z. Huang, L. M. Wu, X. T. Wu, L. H. Li, L. Chen, Y. F. Zhang,  $\text{Pb}_2\text{B}_5\text{O}_9\text{I}$ : An iodide borate with strong second harmonic generation, *J. Am. Chem. Soc.*, 2010, 132, 12788-12789.
- [4] Y. C. Yang, X. Liu, J. Lu, L. M. Wu, L. Chen,  $[\text{Ag}(\text{NH}_3)_2]_2\text{SO}_4$ : A strategy for the coordination of cationic moieties to design nonlinear optical materials, *Angew. Chem. Int. Ed.*, 2021, 60, 21216-21220.
- [5] Z. Ma, J. Hu, R. Sa, Q. Li, Y. Zhang, K. Wu, Screening novel candidates for mid-IR nonlinear optical materials from  $\text{I}_3\text{-V-VI}_4$  compounds, *J. Mater. Chem. C*, 2017, 1963-1972.
- [6] J. P. Perdew, K. Burke, M. Ernzerhof, Generalized gradient approximation made simple, *Phys. Rev. Lett.*, 1996, 77, 3865-3868.
- [7] F. Weigend, R. Ahlrichs, Balanced basis sets of split valence, triple zeta valence and quadruple zeta valence quality for H to Rn: Design and assessment of accuracy, *Phys. Chem. Chem. Phys.*, 2005, 7, 3297-3305.
- [8] F. Weigend, Accurate coulomb-fitting basis sets for H to Rn, *Phys. Chem. Chem. Phys.*, 2006, 8, 1057-1065.
- [9] M. J. Frisch, G. W. Trucks, H. B. Schlegel, G. E. Scuseria, M. A. Robb, J. R. Cheeseman, G. Scalmani, V. Barone, G. A. Petersson, H. Nakatsuji, X. Li, M. Caricato, A. Marenich, J. Bloino, B. G. Janesko, R. Gomperts, B. Mennucci, H. P.

Hratchian, J. V. Ortiz, A. F. Izmaylov, J. L. Sonnenberg, D. Williams-Young, F. Ding, F. Lipparini, F. Egidi, J. Goings, B. Peng, A. Petrone, T. Henderson, D. Ranasinghe, V. G. Zakrzewski, J. Gao, N. Rega, G. Zheng, W. Liang, M. Hada, M. Ehara, K. Toyota, R. Fukuda, J. Hasegawa, M. Ishida, T. Nakajima, Y. Honda, O. Kitao, H. Nakai, T. Vreven, K. Throssell, J. A. Montgomery, Jr., J. E. Peralta, F. Ogliaro, M. Bearpark, J. J. Heyd, E. Brothers, K. N. Kudin, V. N. Staroverov, T. Keith, R. Kobayashi, J. Normand, K. Raghavachari, A. Rendell, J. C. Burant, S. S. Iyengar, J. Tomasi, M. Cossi, J. M. Millam, M. Klene, C. Adamo, R. Cammi, J. W. Ochterski, R. L. Martin, K. Morokuma, O. Farkas, J. B. Foresman, and D. J. Fox, Gaussian 09, Revision A.02, Gaussian, Inc., Wallingford CT, 2016.

[10] T. Lu, F. Chen, Multiwfn: A multifunctional wavefunction analyzer, *J. Comput. Chem.*, 2012, 33, 580-592.
